# Supplementary material for: Human Melanocortin-2 Receptor: Identifying a Role for Residues in the TM4, EC2, and TM5 Domains in Activation and Trafficking as a Result of Co-Expression with the Accessory Protein, Mrap1 in Chinese Hamster Ovary Cells
Source: MDPI journal article supplement (doi:10.3390/biom12101422), 2022-10-04
Supplement: s1 [file s1]

# Supplementary Table S3

## Cell Surface ELIZA of Single Alanine Mutants of hMC2R

|                |                |                               | One-Way ANOVA      |
|----------------|----------------|-------------------------------|--------------------|
| <u>TM4 (A)</u> | <u>Average</u> | <u>S.E.M (n=3)</u>            | <u>p Value</u>     |
| Negative       | 0.162          | $\pm$ 0.001                   | < 0.0001           |
| Positive       | 0.792          | $\pm$ 0.091                   | -                  |
| G162           | 1.420          | $\pm$ 0.081                   | < 0.0001           |
| <b>I163</b>    | <b>0.380</b>   | <b><math>\pm</math> 0.037</b> | <b>0.0016</b>      |
| T164           | 0.705          | $\pm$ 0.011                   | 0.666              |
| <u>TM4 (B)</u> | <u>Average</u> | <u>S.E.M (n=3)</u>            | <u>p Value</u>     |
| Negative       | 0.236          | $\pm$ 0.016                   | < 0.0001           |
| Positive       | 0.598          | $\pm$ 0.091                   | -                  |
| <b>M165</b>    | <b>0.198</b>   | <b><math>\pm</math> 0.016</b> | <b>&lt; 0.0001</b> |
| <b>V166</b>    | <b>0.354</b>   | <b><math>\pm</math> 0.018</b> | <b>&lt; 0.0001</b> |
| I167           | 0.530          | $\pm$ 0.035                   | 0.1275             |
| <u>TM5 (C)</u> | <u>Average</u> | <u>S.E.M (n=3)</u>            | <u>p Value</u>     |
| Negative       | 0.125          | $\pm$ 0.033                   | 0.004              |
| Positive       | 0.423          | $\pm$ 0.027                   | -                  |
| T177           | 0.721          | $\pm$ 0.043                   | 0.0004             |
| <b>F178</b>    | <b>0.212</b>   | <b><math>\pm</math> 0.032</b> | <b>0.0053</b>      |
| T179           | 0.419          | $\pm$ 0.037                   | 0.9954             |
| <u>TM5 (D)</u> | <u>Average</u> | <u>S.E.M (n=3)</u>            | <u>p Value</u>     |
| Negative       | 0.182          | $\pm$ 0.031                   | 0.0447             |
| Positive       | 0.496          | $\pm$ 0.061                   | -                  |
| S180           | 1.496          | $\pm$ 0.076                   | < 0.0001           |
| L181           | 0.518          | $\pm$ 0.126                   | 0.9997             |
| F182           | 0.461          | $\pm$ 0.861                   | 0.9983             |
| P183           | 0.861          | $\pm$ 0.100                   | 0.443              |
| <u>EC2 (E)</u> | <u>Average</u> | <u>S.E.M (n=3)</u>            | <u>p Value</u>     |
| Negative       | 0.219          | $\pm$ 0.003                   | < 0.0001           |
| Positive       | 1.364          | $\pm$ 0.035                   | -                  |
| <b>F168</b>    | <b>0.413</b>   | <b><math>\pm</math> 0.272</b> | <b>0.0001</b>      |
| H170           | 1.171          | $\pm$ 0.157                   | 0.3123             |

Negative Control - hMC2R expressed alone in CHO cells

Positive Control - hMC2R co-expressed with mMrp1 in CHO cells

All mutants were co-expressed with mMrp1 Mutants in highlighted in **red** resulted in a statistically significant drop in trafficking
