# Supplementary material for: Human Melanocortin-2 Receptor: Identifying a Role for Residues in the TM4, EC2, and TM5 Domains in Activation and Trafficking as a Result of Co-Expression with the Accessory Protein, Mrap1 in Chinese Hamster Ovary Cells
Source: MDPI journal article supplement (doi:10.3390/biom12101422), 2022-10-04
Supplement: s1 [file s1]

## Supplementary Table S2

Comparison of Vmax values for hMC2r/xtMc1r Chimeric Receptors

| <u>Receptor</u>  | Vmax*                                       | Percent Change                            |
|------------------|---------------------------------------------|-------------------------------------------|
|                  | Luciferase Units<br><u>mean+S.E.M; n=3)</u> | in Vmax Value<br><u>Relative to hMC2R</u> |
| hMC2R            | 128380+2439                                 | -                                         |
| hMC2R/NT xtMc1r  | 199367+8215                                 | +55%                                      |
| hMC2R/EC1 xtMc1r | 102990+1170                                 | -20%                                      |
| hMC2R/EC2 xtMc1r | 94956+11086 <sup>1</sup>                    | -35%                                      |
| hMC2R/EC3 xtMc1r | 137840+2240                                 | + 7%                                      |

\*Vmax was calculated using the Kaleidograph figure plotting software.

<sup>1</sup>extrapolated from Figure 2B using Kadeidograph software.
