# Supplementary material for: Human Melanocortin-2 Receptor: Identifying a Role for Residues in the TM4, EC2, and TM5 Domains in Activation and Trafficking as a Result of Co-Expression with the Accessory Protein, Mrap1 in Chinese Hamster Ovary Cells
Source: MDPI journal article supplement (doi:10.3390/biom12101422), 2022-10-04
Supplement: s1 [file s1]

## Supplementary Table S1: Nucleotide Sequences

Human MC2R (accession number: AA067714.1)

ATGAAGCACATTATCAACTCGTATGAAAACATCAACAACACAGCAAGAAATAATTCCGACTGTCCTCGTGTGGTTTT  
GCCGGAGGAGATATTTTTTACAATTTCCATTGTTGGAGTTTTGGAGAATCTGATCGTCCTGCTGGCTGTGTTCAAGA  
ATAAGAATCTCCAGGCACCCATGTACTTTTTTCATCTGTAGCTTGGCCATATCTGATATGCTGGGCAGCCTATATAAG  
ATCTTGGAAAATATCCTGATCATATTGAGAAACATGGGCTATCTCAAGCCACGTGGCAGTTTTGAAACCACAGCCGA  
TGACATCATCGACTCCCTGTTTGTCTCTCCCTGCTTGGCTCCATCTTCAGCCTGTCTGTGATTGCTGCGGACCGCT  
ACATCACCATCTTCCACGCACTGCGGTACCACAGCATCGTGACCATGCGCCGCACTGTGGTGGTGTACGGTCATC  
TGGACGTTCTGCACGGGGACTGGCATCACCATGGTGATCTTCTCCCATCATGTGCCACAGTGATCACCTTCACGTC  
GCTGTTCCCGCTGATGCTGGTCTTCATCCTGTGCCTCTATGTGCACATGTTCTGCTGGCTCGATCCCACACCAGGA  
AGATCTCCACCCTCCCCAGAGCCAACATGAAAGGGGCCATCACACTGACCATCCTGCTCGGGGTCTTCATCTTCTGC  
TGGGCCCCCTTTGTGCTTCATGTCTCTTGTGATGACATTCTGCCAAGTAACCCCTACTGCGCCTGCTACATGTCTCT  
CTTCCAGGTGAACGGCATGTTGATCATGTGCAATGCCGTCAATTGACCCCTTCATATATGCCTTCCGGAGCCCAGAGC  
TCAGGGACGCATTCAAAAAGATGATCTTCTGCAGCAGGTACTGGTGA

*Xenopus tropicalis* Mc1r (accession number: XP 012817790)

ATGCTTCACTCAACAGTCAACTCCACCAATGCCACCATCAATGTTGGGACTGAACTTAAGCCAACCAACACATCCGA  
CACTGTTATGGACGTTCCAGAAGAGCTCTTCTGTTCTGTGTGTGTTGAGTTTGTAGAAAACATACTTGTGGTCA  
TTGCCATTTTTAGGAACCACAACCTGCACTCTCCCATGTATTATTTTCATCTGCTGCCTGGCTGCATCTGATATGCTT  
GTAAGTTCTAGCAACCTAGGTGAGACCCTCATCATTTTTATGCTTAAGCAAGGGATTATAAAATCTGAGCCACTGCT  
TGTCAAAAAAATGGATTATATATTTGATACAATGATCTGCTGCTCTTTAGTAACCTCTCTCTCTCTTTCTTGGGGCCA  
TTGCAATTGACCGATACATCACCATCTTCTATGCCTTGCCTATCACAGCATTATGACACTGCGCAGAGTAGTTATT  
GCCATAGGCGTGATCTGGTCGGTCAGTTTAGTTTGTGCGGCCATATTCATTGTCTATCATGAGAGTCGTGCTGTCTAT  
CTTATGTCTTATTGTATTTTTTCTCTTCATGTTGGCCTTGATGGTGGCTTTATATATCCACATGTTTGTCTCTGGCTC  
GCCAGCACGCACGTAGCATCTCTGCCCTGCAGAAGGGGAAGAGTAGGAGAATTACCCACATCAAGCTAGGGCAAAC  
ATGAAAGGAGCCATAACACTAACATTGTTGCTTGGCGTCTTTTTTCTTTGTTGGGGGCCTCTGTTCTCTCCACCTCAC  
TTTGTGTGTCTGCTGCCCCGGTCATCATATTTGCAATAGCTATTTTTACTATTTCAACATCTACCTCCTTCTTGTCA  
TCTGCAATTCGTATTGACCCCTTAATCTACGCCTTCAGGAGTCAGGAGCTAAGGAAGACCCTCAAGGAAATTGTC  
TGGTGCTCTTGGTGA

Chimeric hMC2R/N-terminal xtMC1R (**in red**) Cys codon underlined

ATGCTTCACTCAACAGTCAACTCCACCAATGCCACCATCAATGTTGGGACTGAACTTAAGCCAACCAACACATCCTG  
CACTGTTATGGACGTTCCAGAAGAGATATTTTTTACAATTTCCATTGTTGGAGTTTTGGAGAATCTGATCGTCCTGC  
TGGCTGTGTTCAAGAATAAGAATCTCCAGGCACCCATGTACTTTTTTCATCTGTAGCTTGGCCATATCTGATATGCTG  
GGCAGCCTATATAAGATCTTGGAAAATATCCTGATCATATTGAGAAACATGGGCTATCTCAAGCCACGTGGCAGTTT  
TGAAACCACAGCCGATGACATCATCGACTCCCTGTTTGTCTCTCCCTGCTTGGCTCCATCTTCAGCCTGTCTGTGA  
TTGCTGCGGACCGCTACATCACCATCTTCCACGCACTGCGGTACCACAGCATCGTGACCATGCGCCGCACTGTGGTG  
GTGCTTACGGTCATCTGGACGTTCTGCACGGGGACTGGCATCACCATGGTGATCTTCTCCCATCATGTGCCACAGT  
GATCACCTTCACGTCGCTGTTCCCGCTGATGCTGGTCTTCATCCTGTGCCTCTATGTGCACATGTTCTGCTGGCTC  
GATCCCACACCAGGAAGATCTCCACCCTCCCAGAGCCAACATGAAAGGGGCCATCACACTGACCATCCTGCTCGGG  
GTCTTCATCTTCTGCTGGGCCCTTTGTGCTTCATGTCTCTTGTGATGACATTCTGCCAAGTAACCCCTACTGCGC  
CTGCTACATGTCTCTTCCAGGTGAACGGCATGTTGATCATGTGCAATGCCGTCAATTGACCCCTTCATATATGCCT  
TCCGGAGCCCAGAGCTCAGGGACGCATTCAAAAAGATGATCTTCTGCAGCAGGTACTGGTAG

Chimeric hMC2R/EC1 xtMC1R (in red)

ATGAAGCACATTATCAACTCGTATGAAAACATCAACAACACAGCAAGAAATAATTCCGACTGTCCTCGTGTGGTTTT  
GCCGGAGGAGATATTTTTTACAATTTCCATTGTTGGAGTTTTGGAGAATCTGATCGTCCTGCTGGCTGTGTTCAAGA  
ATAAGAATCTCCAGGCACCCATGTACTTTTTTCATCTGTAGCTTGGCCATATCTGATATGCTGGGCAGCCTATATAAG  
ATCTTGGAATATCCTGATT**TTTATGCTTAAGCAAGGGATTATAAAATCTGAGCCACTGCTTGTCAAAAAATGGA**  
TGACATCATCGACTCCCTGTTTGTCTCTCCCTGCTTGGCTCCATCTTCAGCCTGTCTGTGATTGCTGCGGACCGCT  
ACATCACCATCTTCCACGCACTGCGGTACCACAGCATCGTGACCATGCGCCGCACTGTGGTGGTGCTTACGGTCATC  
TGGACGTTCTGCACGGGGACTGGCATCACCATGGTGATCTTCTCCCATCATGTGCCACAGTGATCACCTTCACGTC  
GCTGTTCCCGCTGATGCTGGTCTTCATCCTGTGCCTCTATGTGCACATGTTCTGCTGGCTCGATCCACACCAGGA  
AGATCTCCACCCTCCCCAGAGCCAACATGAAAGGGGCCATCACACTGACCATCCTGCTCGGGGTCTTCATCTTCTGC  
TGGGCCCCCTTTGTGCTTCATGTCTCTTGATGACATTCTGCCCAAGTAACCCCTACTGCGCCTGCTACATGTCTCT  
CTTCCAGGTGAACGGCATGTTGATCATGTGCAATGCCGTCATTGACCCCTTCATATATGCCTTCCGGAGCCCAGAGC  
TCAGGGACGCATTCAAAAAGATGATCTTCTGCAGCAGGTACTGGTGA

Chimeric hMC2R/EC2 xtMC1R (in red)

ATGAAGCACATTATCAACTCGTATGAAAACATCAACAACACAGCAAGAAATAATTCCGACTGTCCTCGTGTGGTTTT  
GCCGGAGGAGATATTTTTTACAATTTCCATTGTTGGAGTTTTGGAGAATCTGATCGTCCTGCTGGCTGTGTTCAAGA  
ATAAGAATCTCCAGGCACCCATGTACTTTTTTCATCTGTAGCTTGGCCATATCTGATATGCTGGGCAGCCTATATAAG  
ATCTTGGAATATCCTGATCATATTGAGAAACATGGGCTATCTCAAGCCACGTGGCAGTTTTGAAACCACAGCCGA  
TGACATCATCGACTCCCTGTTTGTCTCTCCCTGCTTGGCTCCATCTTCAGCCTGTCTGTGATTGCTGCGGACCGCT  
ACATCACCATCTTCCACGCACTGCGGTACCACAGCATCGTGACCATGCGCCGCACTGTGGTGGTGCTTACGGTCATC  
TGGACGTTCTGCACGGGGACTGGCATCACCATGGTGATC**TATCATGAGAGTCGTGCTGTCACTTAA**ACCTTCACGTC  
GCTGTTCCCGCTGATGCTGGTCTTCATCCTGTGCCTCTATGTGCACATGTTCTGCTGGCTCGATCCACACCAGGA  
AGATCTCCACCCTCCCCAGAGCCAACATGAAAGGGGCCATCACACTGACCATCCTGCTCGGGGTCTTCATCTTCTGC  
TGGGCCCCCTTTGTGCTTCATGTCTCTTGATGACATTCTGCCCAAGTAACCCCTACTGCGCCTGCTACATGTCTCT  
CTTCCAGGTGAACGGCATGTTGATCATGTGCAATGCCGTCATTGACCCCTTCATATATGCCTTCCGGAGCCCAGAGC  
TCAGGGACGCATTCAAAAAGATGATCTTCTGCAGCAGGTACTGGTGA

Chimeric hMC2R/EC3 xtMclr (in red) Cys codon underlined

ATGAAGCACATTATCAACTCGTATGAAAACATCAACAACACAGCAAGAAATAATTCCGACTGTCCTCGTGTGGTTTT  
GCCGGAGGAGATATTTTTTACAATTTCCATTGTTGGAGTTTTGGAGAATCTGATCGTCCTGCTGGCTGTGTTCAAGA  
ATAAGAATCTCCAGGCACCCATGTACTTTTTTCATCTGTAGCTTGGCCATATCTGATATGCTGGGCAGCCTATATAAG  
ATCTTGGAATATCCTGATCATATTGAGAAACATGGGCTATCTCAAGCCACGTGGCAGTTTTGAAACCACAGCCGA  
TGACATCATCGACTCCCTGTTTGTCTCTCCCTGCTTGGCTCCATCTTCAGCCTGTCTGTGATTGCTGCGGACCGCT  
ACATCACCATCTTCCACGCACTGCGGTACCACAGCATCGTGACCATGCGCCGCACTGTGGTGGTGCTTACGGTCATC  
TGGACGTTCTGCACGGGGACTGGCATCACCATGGTGATCTTCTCCCATCATGTGCCACAGTGATCACCTTCACGTC  
GCTGTTCCCGCTGATGCTGGTCTTCATCCTGTGCCTCTATGTGCACATGTTCTGCTGGCTCGATCCACACCAGGA  
AGATCTCCACCCTCCCCAGAGCCnAACATGAAAGGGGCCATCACACTGACCATCCTGCTCGGGGTCTTCATCTTCTG  
CTGGGCCCCCTTTGTGCTTCATGTCTCTTGATG**GTGTTCTGCCCCGGTCATCATATTTGCAAT****TGCTATTTTTACT**  
**ATTTCCAGGTGAACGGCATGTTGATCATGTGCAATGCCGTCATTGACCCCTTCATATATGCCTTCCGGAGCCCAGAG**  
**CTCAGGGACGCATTCAAAAAGATGATCTTCTGCAGCAGGTACTGGTGA**

The nucleotide sequences for *hmc2r* and *xtmc1r* and the four chimeric receptor cDNAs: hMC2R/N-terminal xtMC1R, Chimeric hMC2R/EC1 xtMC1R, hMC2R/EC2 xtMC1R, and hMC2R/EC3 xtMclr are presented. The location the xtMclr nucleotide sequence in each chimeric construct is highlighted in red. The location of the cysteine codon in the NT and EC3 chimeric constructs is highlighted in green and underlined.
